# Supplementary material for: Phytoferritin functions in two interface-loading of natural pigment betanin and caffeic acid with enhanced color stability and the sustained release of betanin
Source: Royal Society of Chemistry journal article supplement (doi:10.1039/d3fo02054a), 2023-01-01
Supplement: d3fo02054a1.pdf [file d3fo02054a1.pdf]

1     **Phytoferritin functions in two interfaces-loading of**  
2             **natural pigment betanin and caffeic acid with**  
3             **enhanced color stability and sustained release of**  
4                     **betanin**

5     Yidan Zhang,<sup>a,1</sup> Xinmei Sha,<sup>a,1</sup> Jiangnan Hu,<sup>a</sup> Jincan Wu,<sup>a</sup> Yue Li,<sup>a</sup> Junrui Ma,<sup>a</sup> Haili Sun,<sup>a</sup>  
6                                     Rui Yang<sup>a,\*</sup>

7  
8     <sup>a</sup> State Key Laboratory of Food Nutrition and Safety, College of Food Science and  
9     Engineering, Tianjin University of Science & Technology, Tianjin, 300457, China.

10    <sup>1</sup>These authors contributed equally to this work.

11

12

13

14

15

16

17

18

19

20    \*Corresponding author

21    Dr. Rui Yang (PHD)

22    E-mail: [yangrui@tust.edu.cn](mailto:yangrui@tust.edu.cn)

23    Tianjin University of Science & Technology

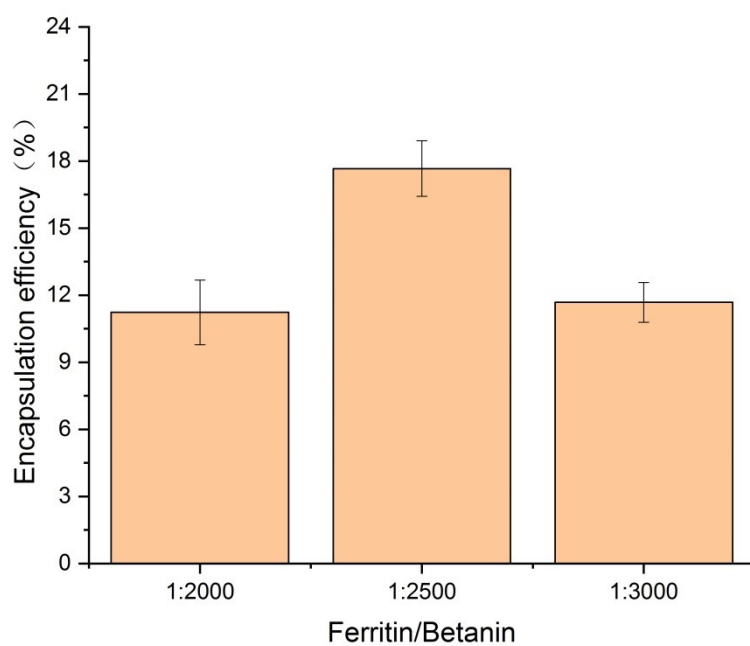

24  
25 **Fig. S1.** Encapsulation efficiency of betanin in ferritin with different applying  
26 amounts of betanin (ferritin/betanin, molar ratio).

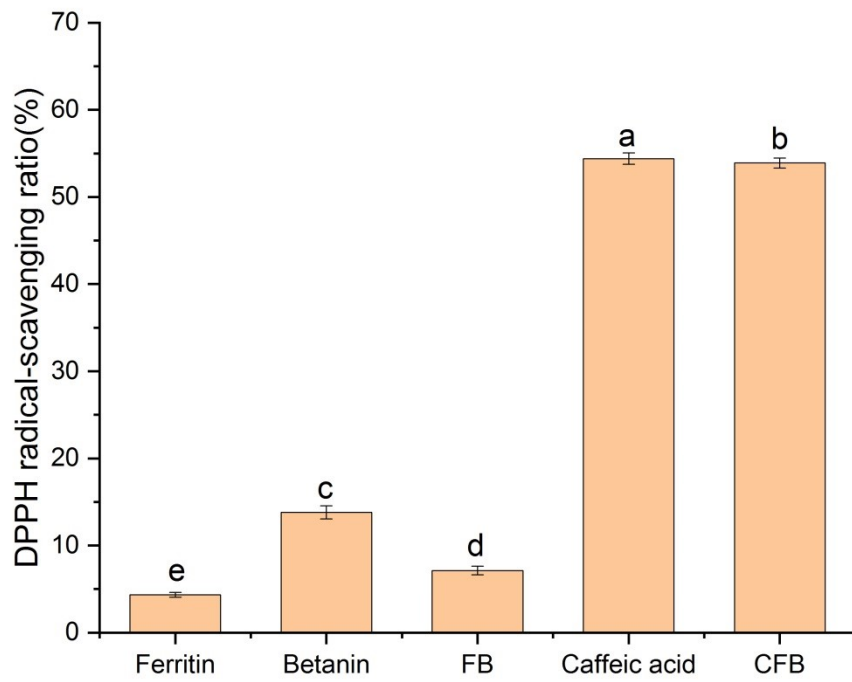

28

29 **Fig. S2.** Antioxidant activities of betanin, ferritin, caffeic acid, FB, and CFB by the  
30 DPPH radical scavenging method.
